# Supplementary material for: ATF4 Transcriptionally Activates SHH to Promote Proliferation, Invasion, and Migration of Gastric Cancer Cells
Source: MDPI journal article supplement (doi:10.3390/cancers15051429), 2023-02-23

## Supplementary S1

ATF4 promotes proliferation, invasion, and migration of gastric cancer cells.

(Figure AB) ATF4 knockdown strongly inhibits the proliferation and invasion of GC cells, there was no significant difference in growth, migration and invasion capacity between the sh-ATF4 AGS group and the HGC27 group.

(Figure CD) there was no significant difference in growth, migration and invasion capacity between the oe-ATF4 MGC803 group and AGS group.

\*\*  $p < 0.01$ , \*\*\*  $p < 0.001$ , and \*\*\*\*  $p < 0.0001$ . ns means statistically insignificant.

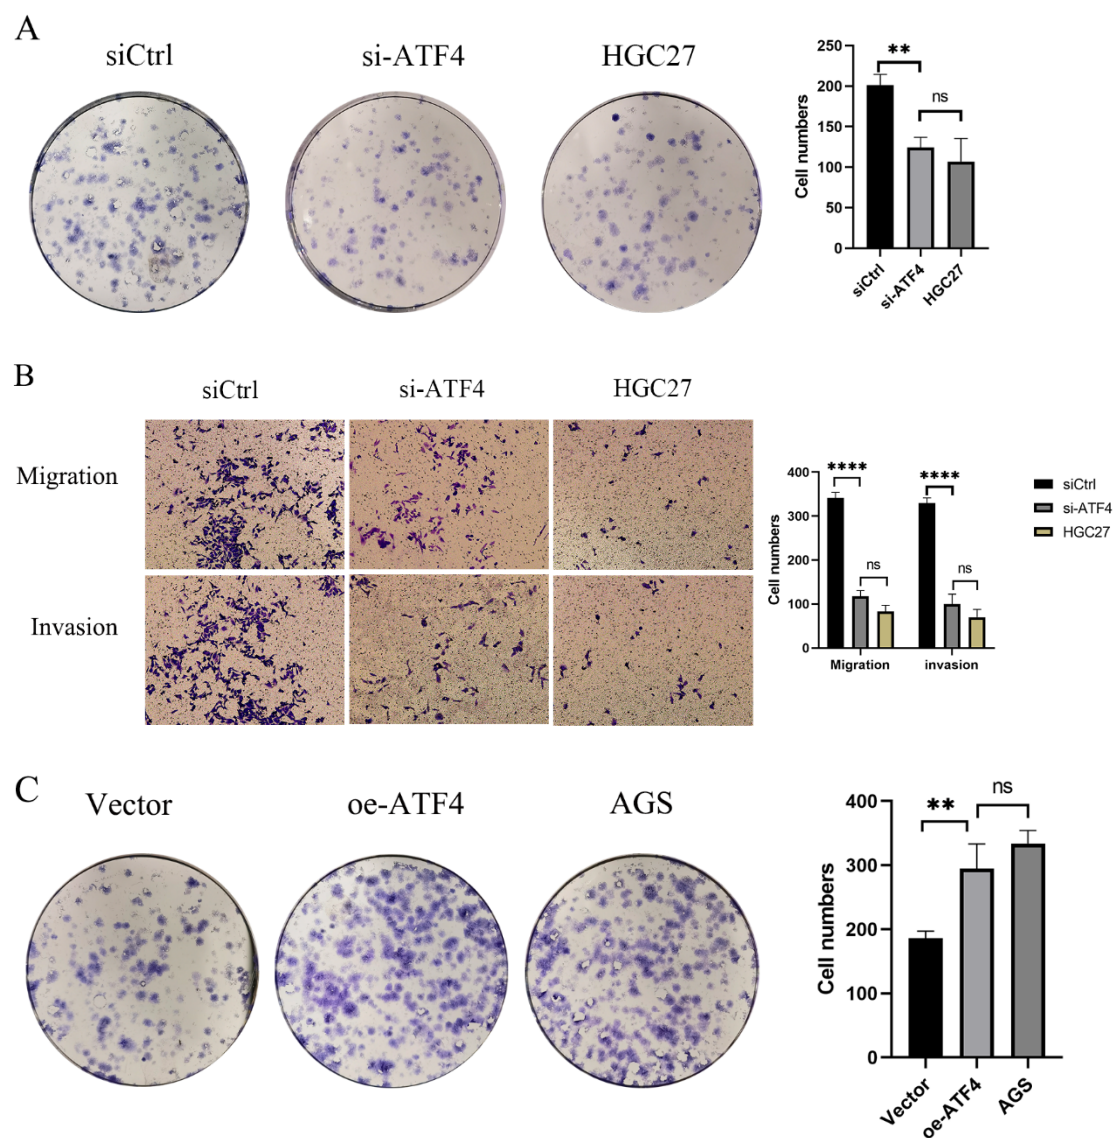

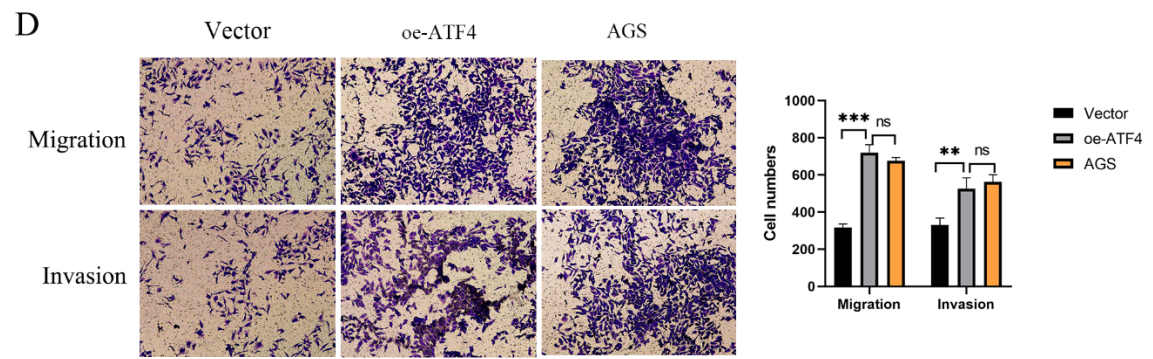

## Supplementary S2

The original western blot figures.

Figure 1B

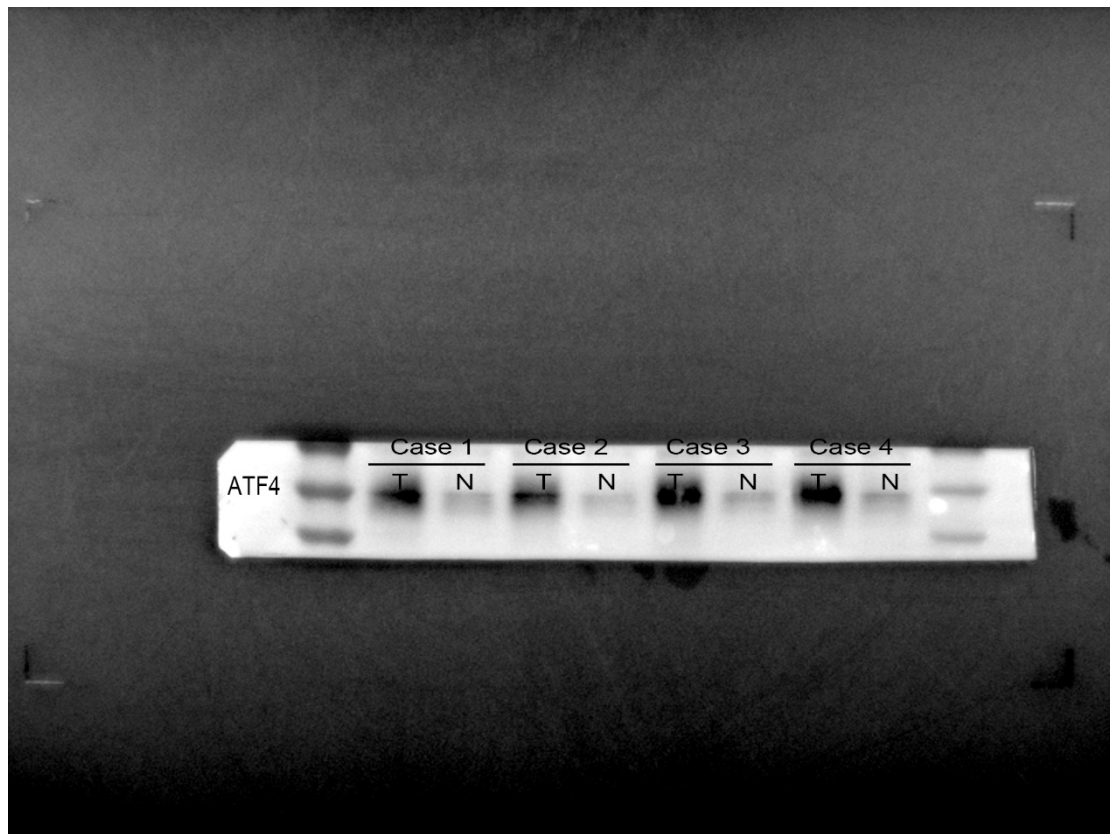

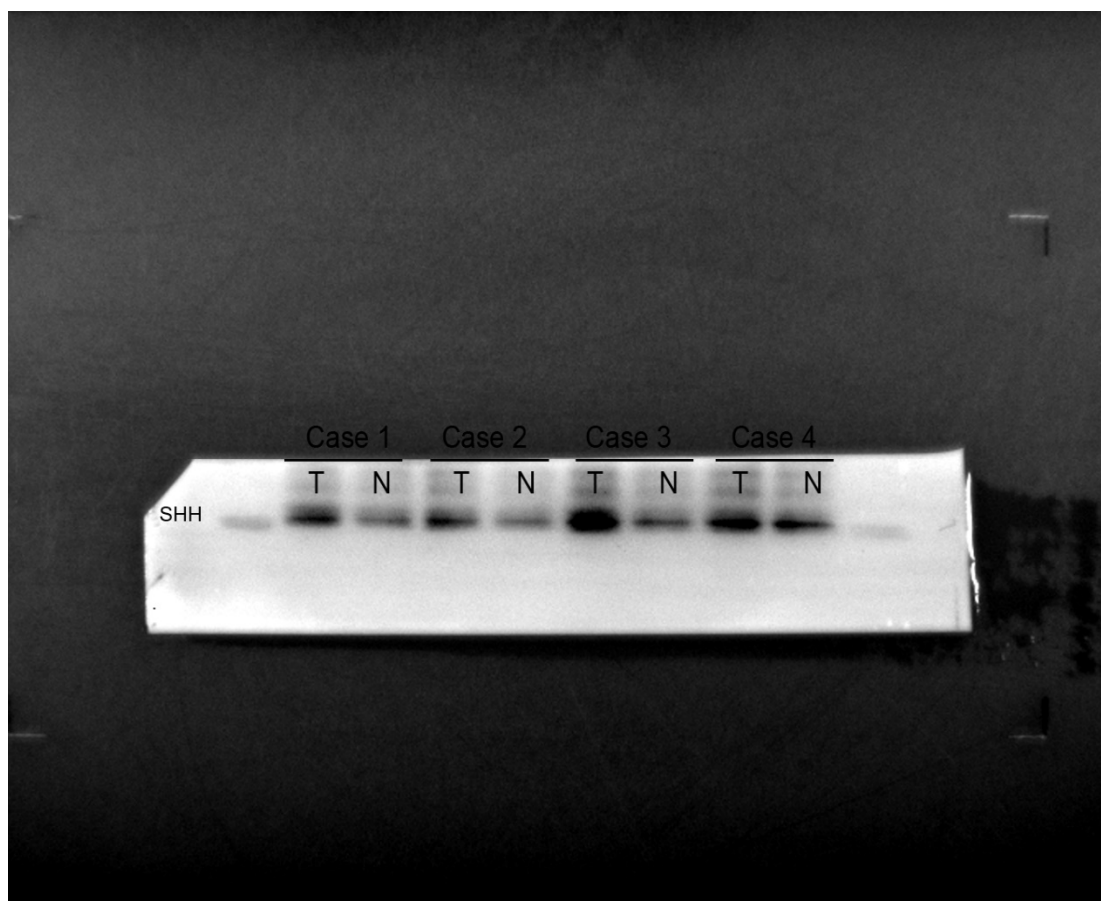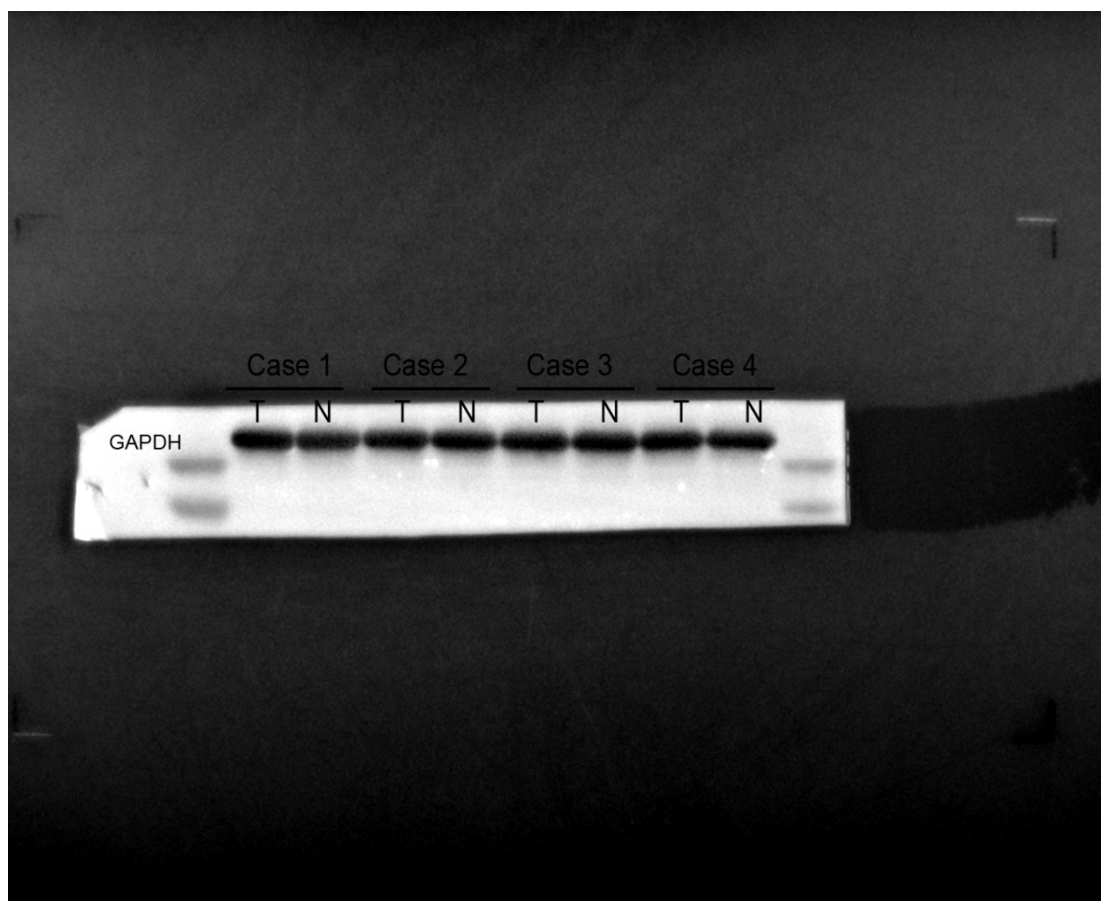

Figure 1E

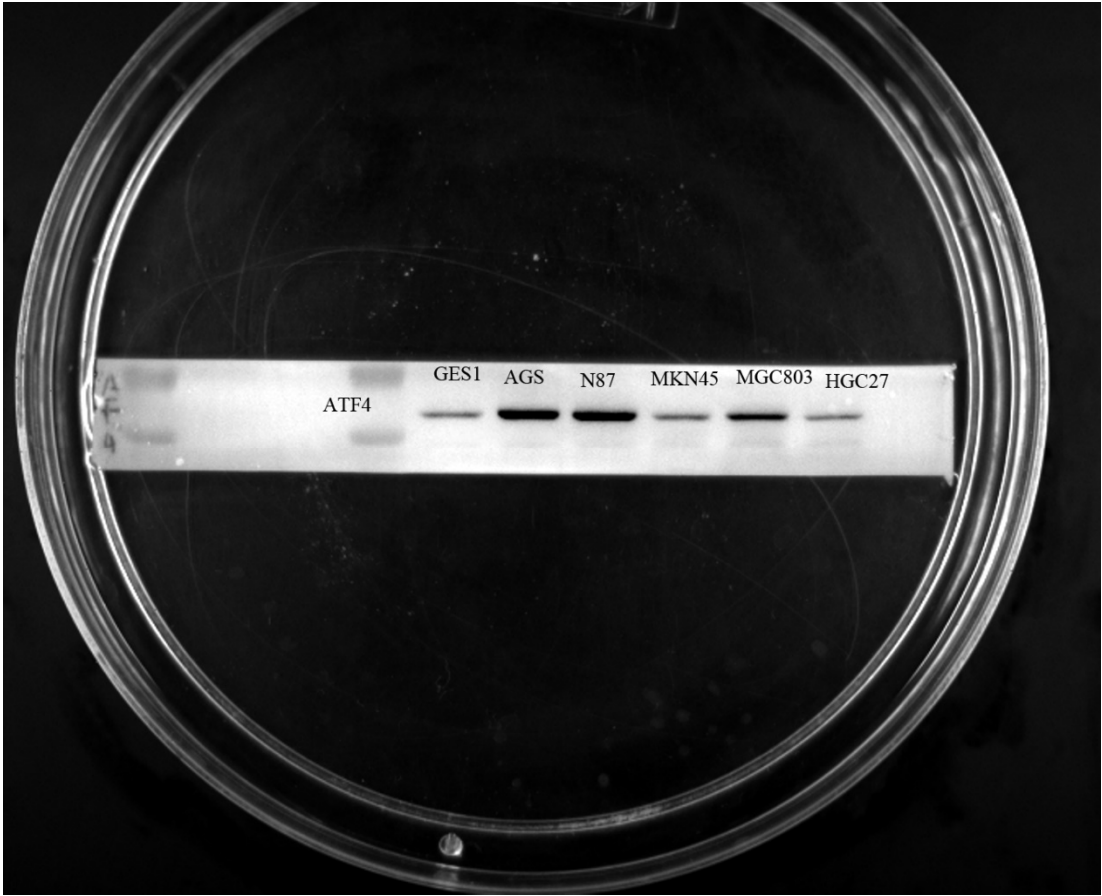



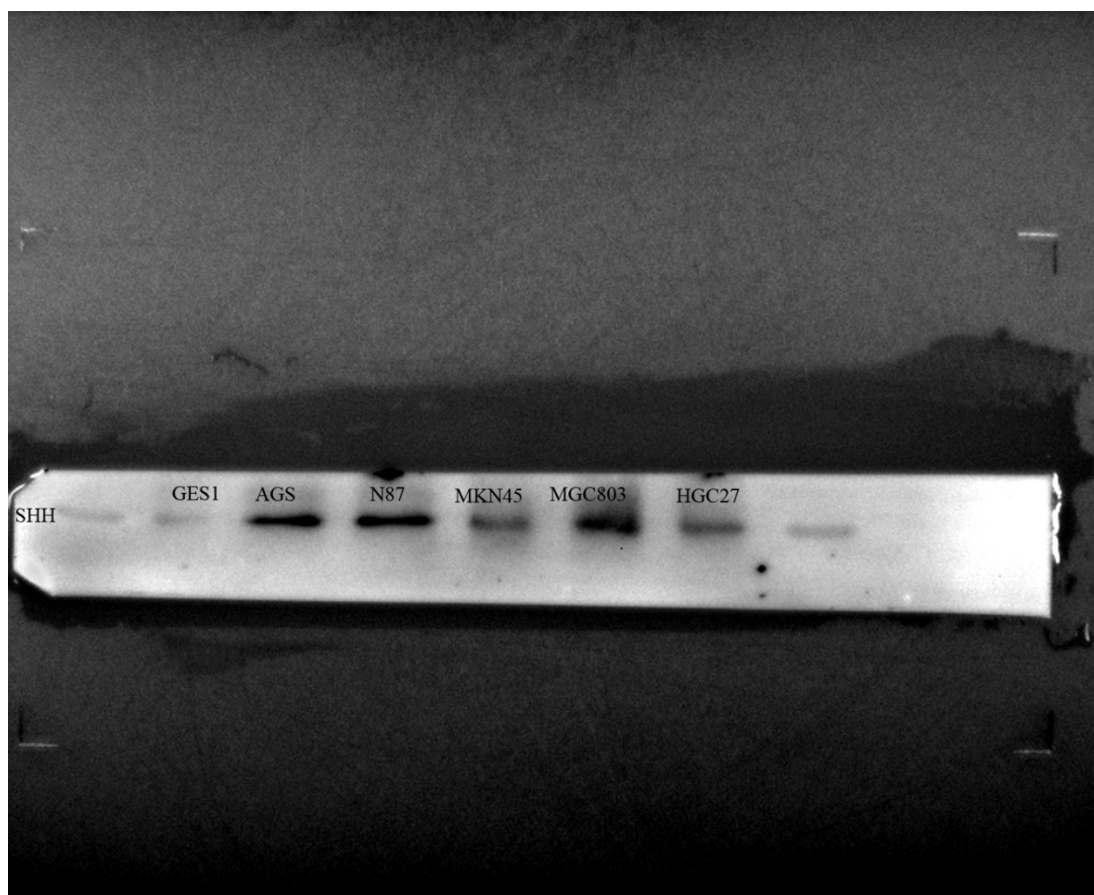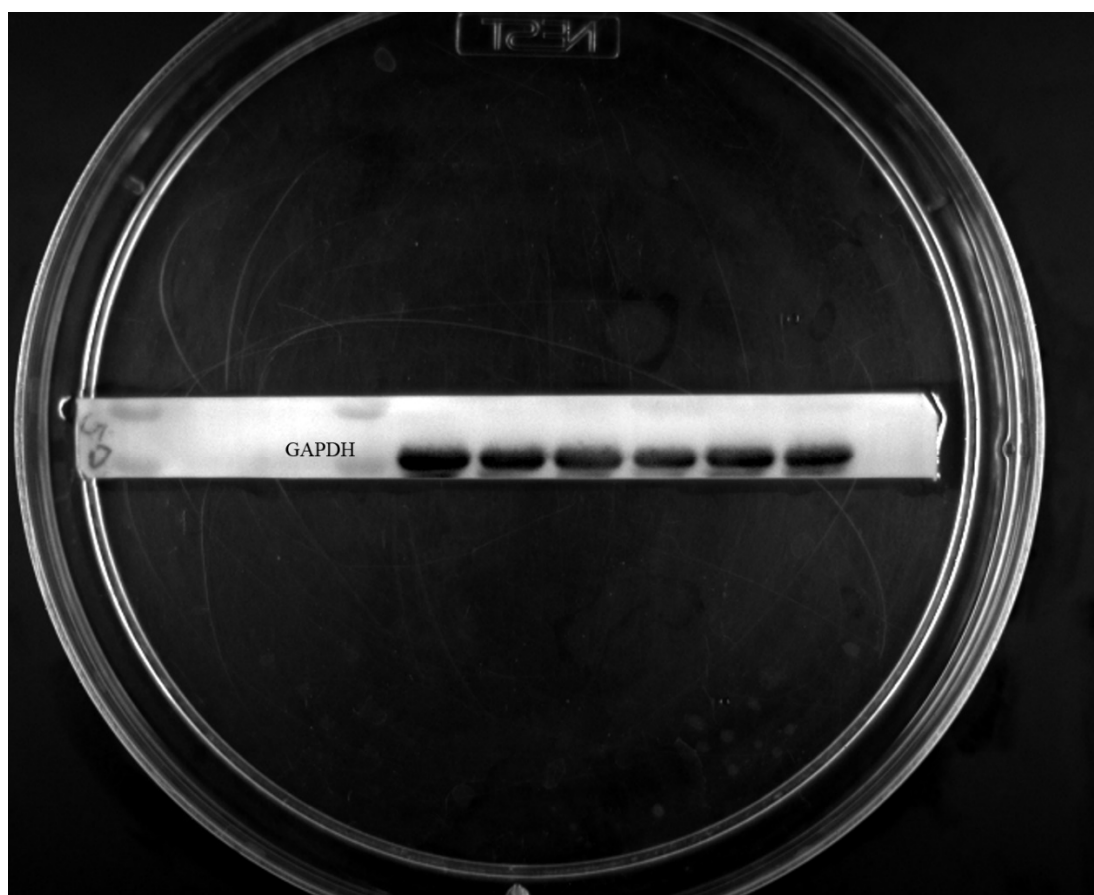

Figure 2B

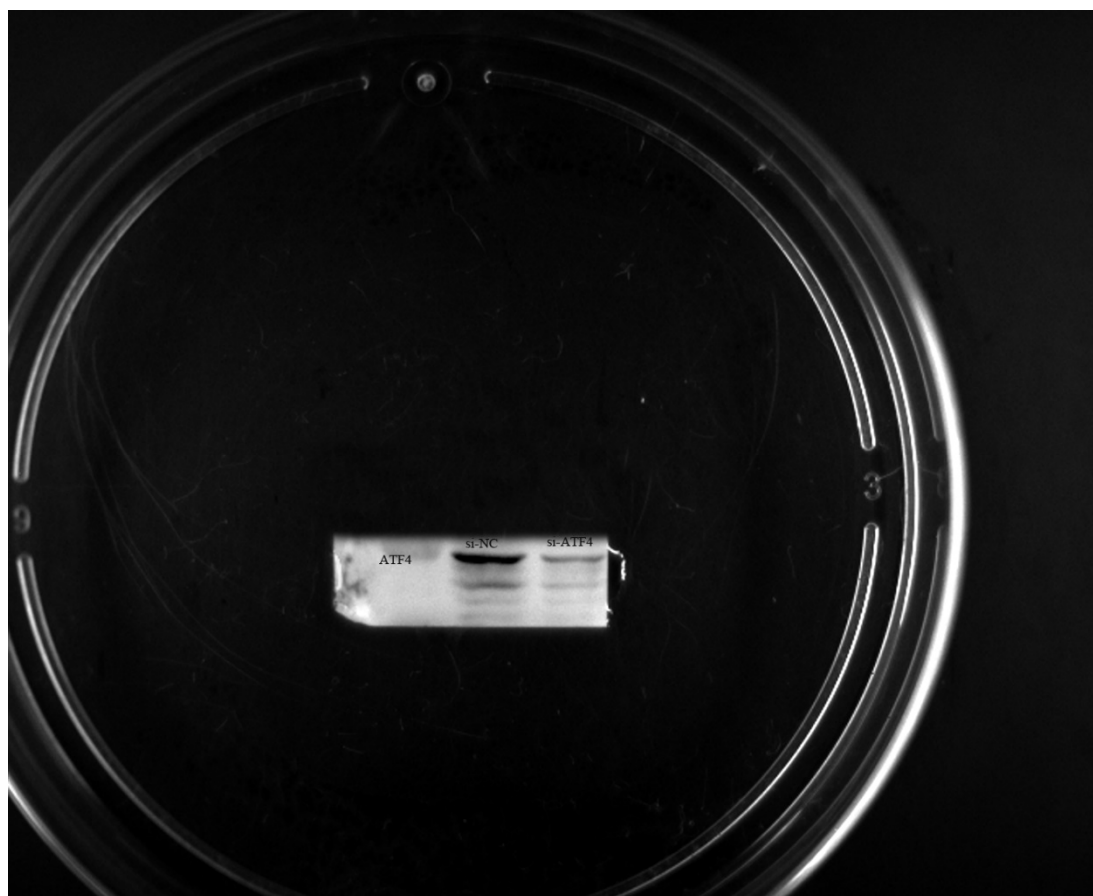

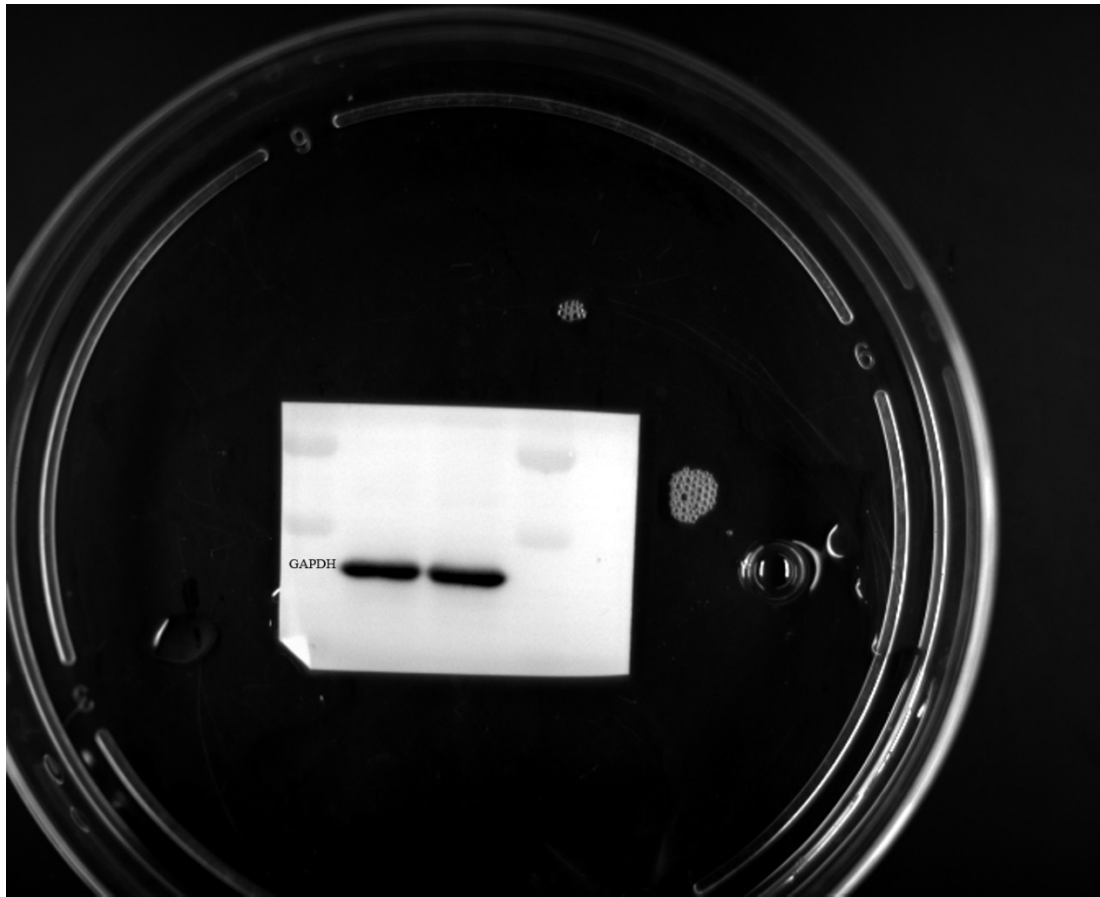

Figure 3B

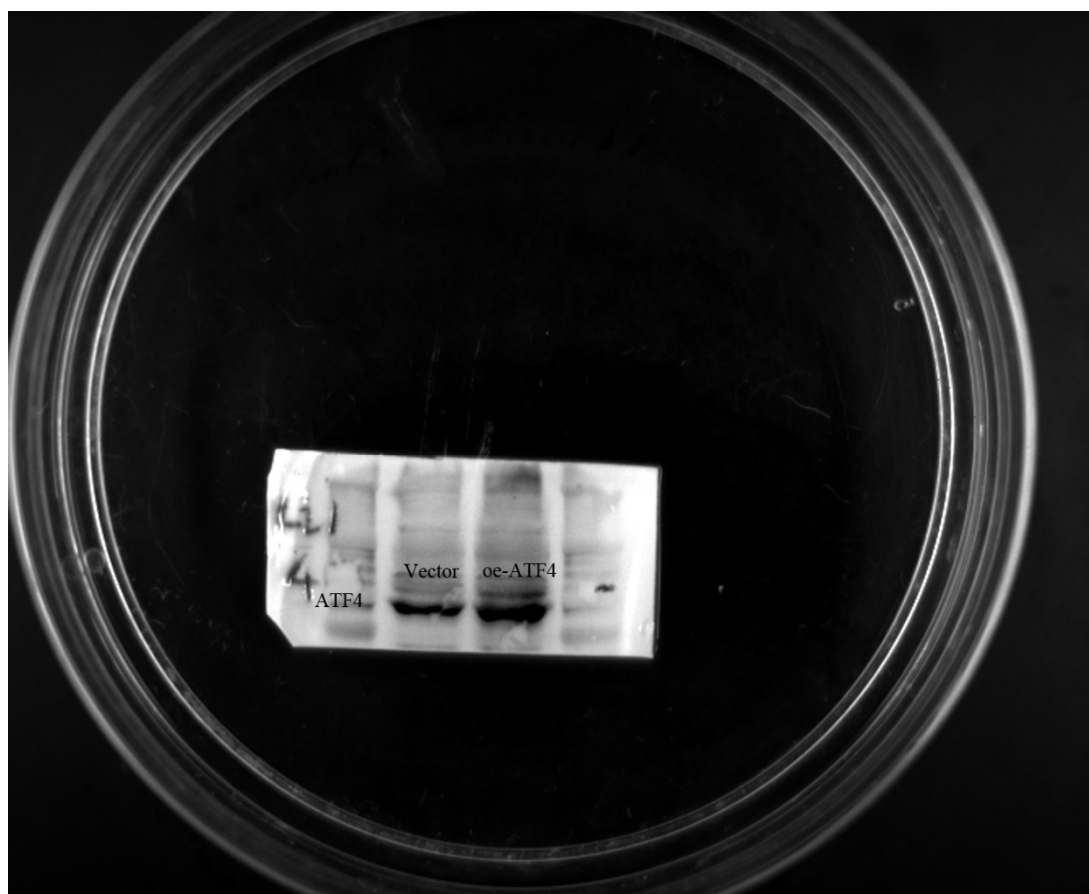



Figure 4C

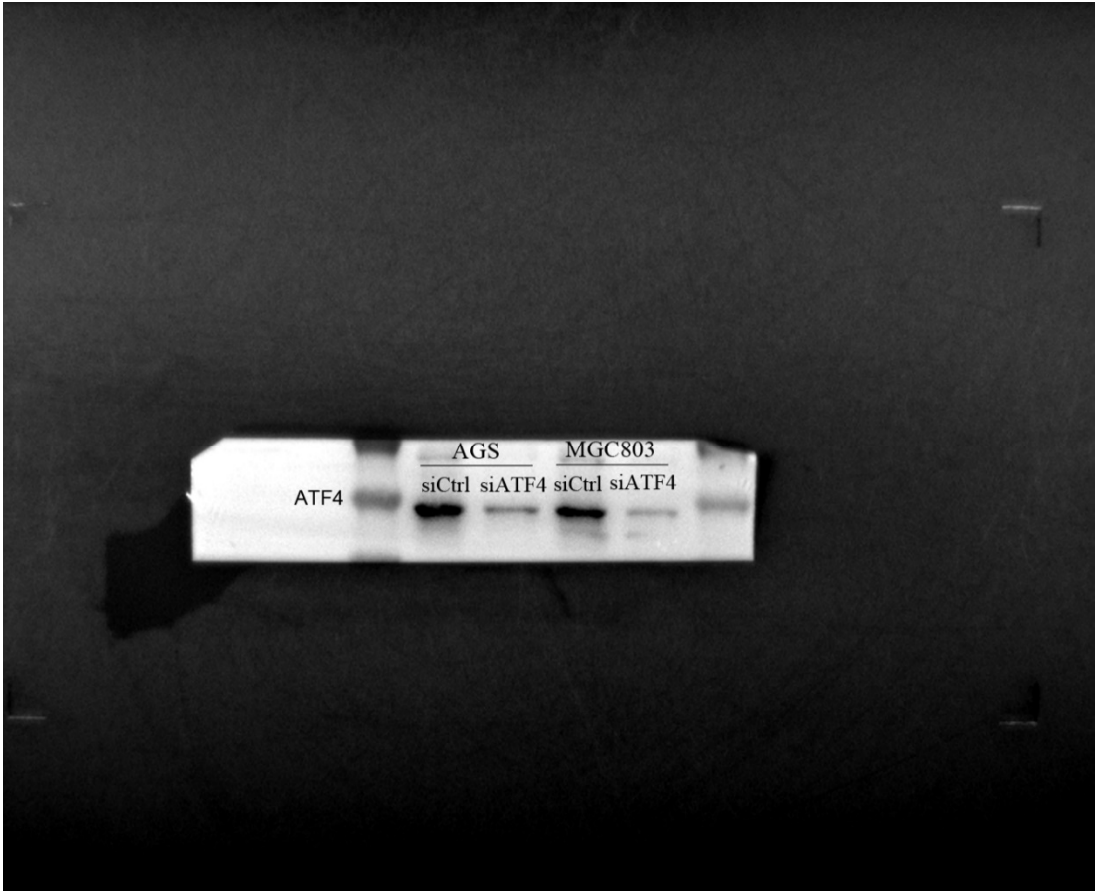

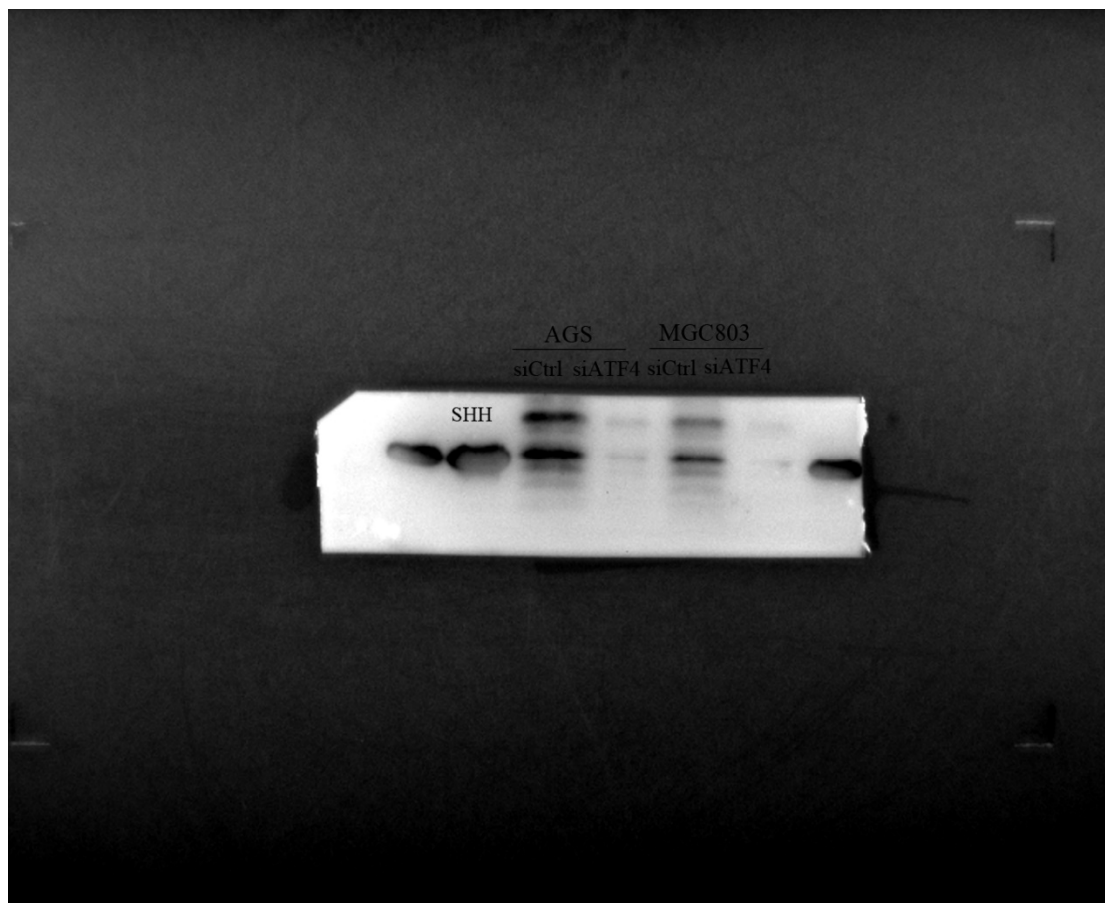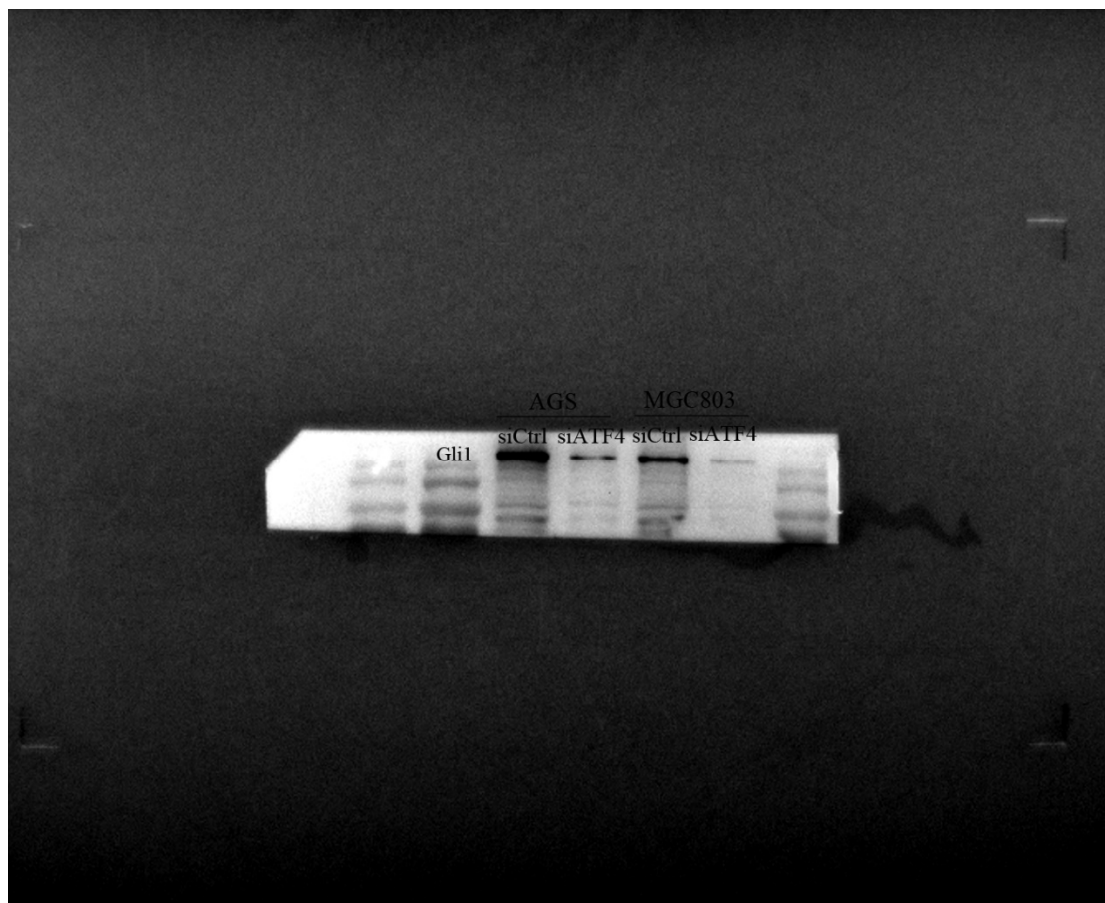

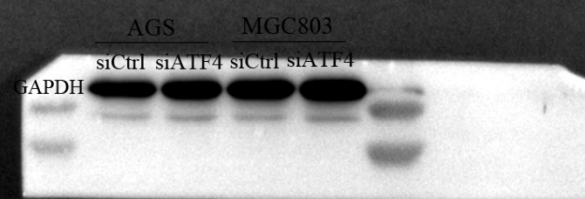

Figure 4D

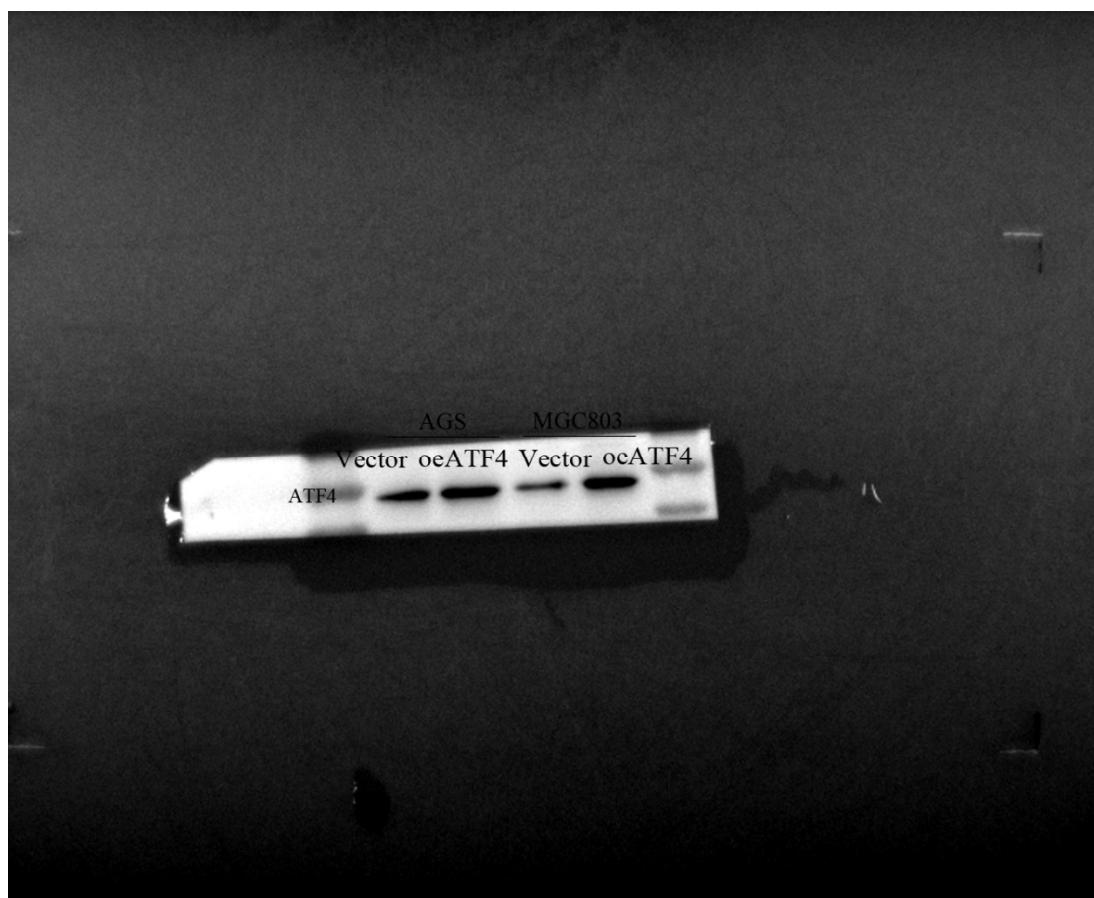



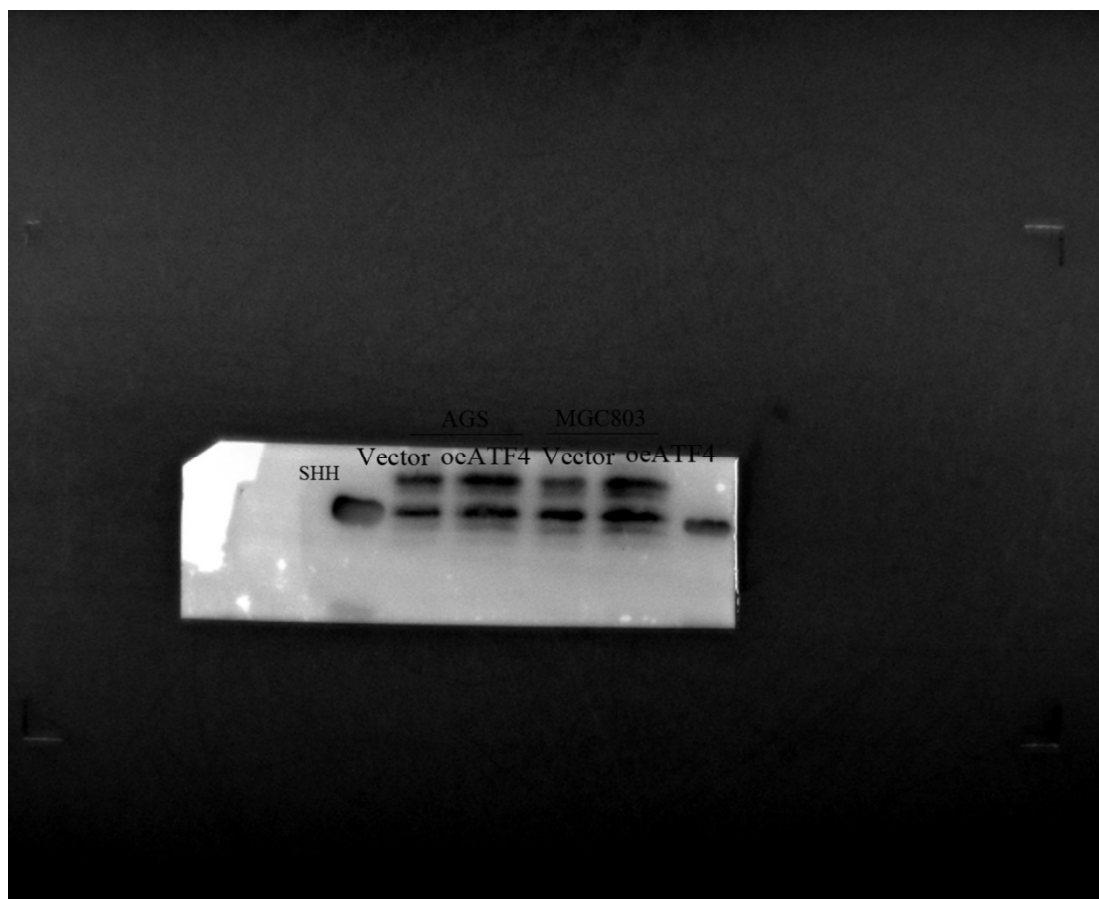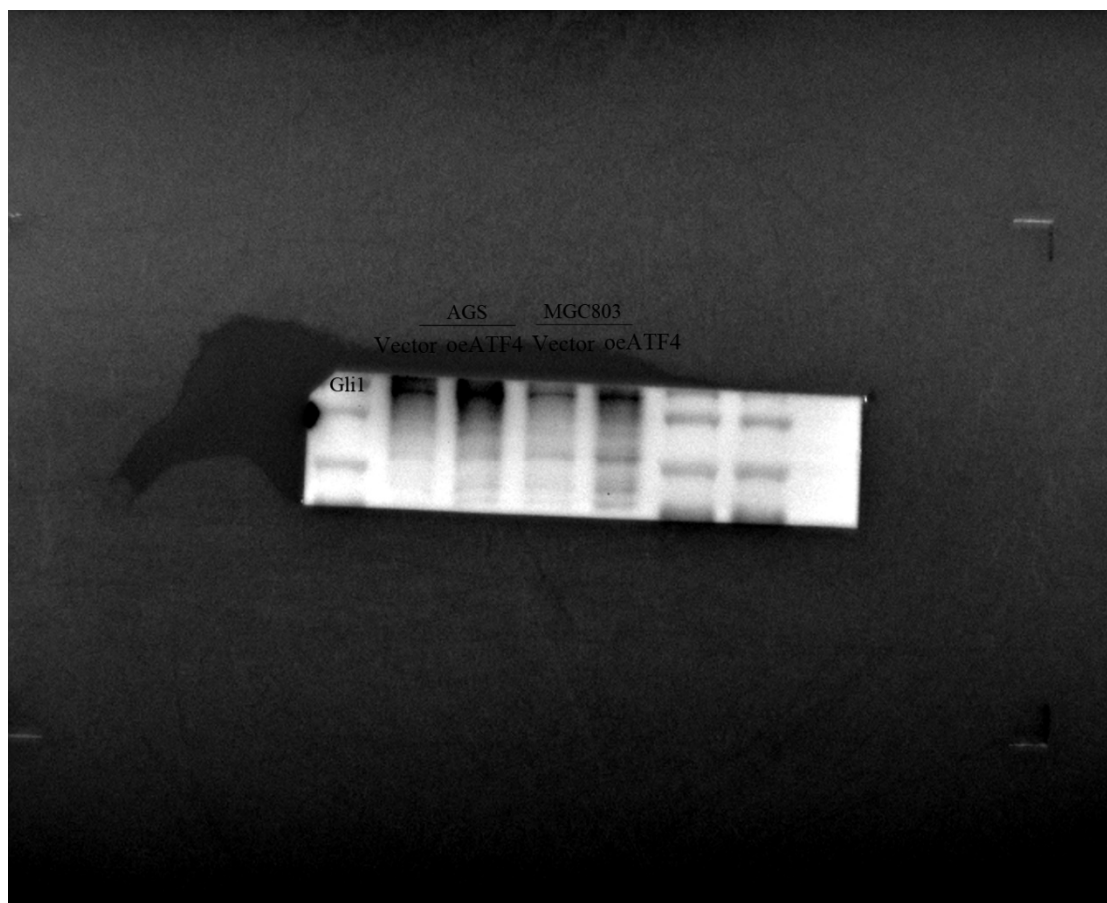

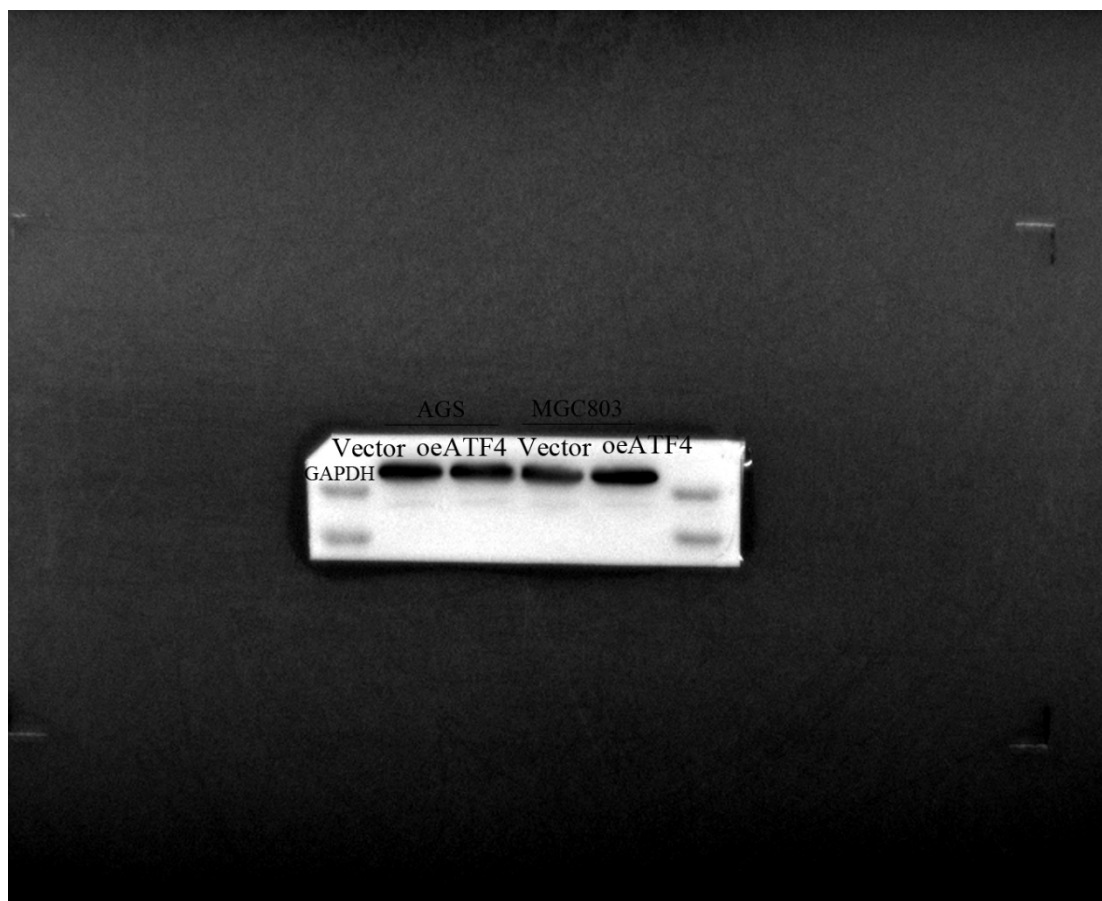

Supplement: s1 [file s1]
